# Supplementary material for: eNOS-induced vascular barrier disruption in retinopathy by c-Src activation and tyrosine phosphorylation of VE-cadherin
Source: eLife. 2021 Apr 28;10:e64944. doi: 10.7554/eLife.64944 (PMC8087444; doi:10.7554/eLife.64944)
Supplement: Figure 1—source data 1. [file elife-64944-fig1-data1.xlsx]

## Sheet: Figure 1
Raw data for Figure 1, panels C-H
	Fig 1 C			Fig 1 E			Fig 1 F			Fig 1 G							Fig 1 H
	WT	S1176A		WT	S1176A		WT	S1176A		WT			eNOS S1176A				WT	S1176A
	5.45	1.05		9.94	7.34		19.21	18.2921		mean	SD	n	mean	SD	n		124	121
	6.78	0.65		8.399	7.162		19.09	14.7563		7918.08	19556.7	124	6024.35	12347.7	121		87	121
	10.37	0.98		11.3058	9.8135		14.3556	15.7194		13606.4	30103.3	87	5967.86	17329.8	121		141	88
	8.49	1.18		11.4639	5.7001		20.2981	15.2557		7581.06	10821.8	141	10125.1	21332.4	88		115	69
	9.57	0.55		10.2844	1.9849		18.0128	13.4687		17373.6	33259.6	75	11898.9	23888.7	69		75	120
	5.21	1.8		10.1132			17.3818			17938.1	40059.7	81	8257.67	16158.4	120		81	170
	7.38	0.21		9.1816			12.9869			9837.61	23548.9	111	6420.15	19093.2	170		111	69
	12.08	0.63								7207.15	20668.2	214	2904.74	6443.41	69		86
										11802.2	23258.3	86

## Sheet: Fig1 Supplement 1
Raw data for Figure 1- supplement figure 1, panels B-C, E-G
	Fig 1 - SFig 1B			Fig 1 - SFig 1C			Fig 1 - S-Fig 1E			Fig 1 - S-Fig 1F			Fig 1 - SFig 1G
	WT	S1176A		WT	S1176A		WT	S1176A		WT	S1176A		WT	S1176A
	87.42	100.04		91.5	88.25		0.993467	0.961245		1.00971	0.983819		0.926813	0.960945
	91.38	87.91		94.75	93.25		0.998403	1.14443		1.00971	1.00971		1.06072	0.995077
	88.03	80.63		88.59	98.37		1.02747	0.973758		0.951456	1.26861		0.979324	1.15524
	81.42	83.45		87.96	83.21		0.980662	0.836858		1.02913	0.873786		1.03315	1.05809
		79.32			81.58			0.909371			1.12621			1.08172

## Sheet: Fig1 Supplement 2
Raw data for Figure 1- supplement figure 2, panel B
	Fig 1- SFig 2B
	WT	S1176A
	0.325036	0.351255
	0.362232	0.366963
	0.335628	0.348595
	0.363514	0.367644
		0.371027

## Sheet: Fig1 Supplement 3
Raw data for Figure 1- supplement figure 3, panels, B, D, F
	Fig 1-SFig 3B				Fig 1- SFig 3D				Fig 1- SFig 3F
	WT	S1176A			WT	S1176A			WT	S1176A
	0.463242	0.760728			23097	11306			0.1421	0.839316
	0.644606	0.708926			28423	14983			0.646182	0.836424
	0.697169	0.621567			18019	34383			0.438463	0.879659
	0.627428	0.677432			24322	26079			0.408195	0.851524

## Sheet: Figure 1 Supplement 4
Raw data for Figure 1- supplement figure 4, panels A-D
	Fig 1- SFig 4A						Fig 1 - SFig 4B						Fig 1- SFig 4C						Fig 1- SFig 4D													S1-Fig 4E
	Normoxia		OIR				Normoxia		OIR				Normoxia		OIR				Normoxia						OIR							Normoxia						OIR
	WT	S1176A	WT	S1176A			WT	S1176A	WT	S1176A			WT	S1176A	WT	S1176A			Nos2			Nos3			Nos2			Nos3				Nos2			Nos3			Nos2			Nos3
	1	1.79	5.78	3.25			1	1.12	1.07	0.83			0.879434	1.13227	1.27943	1.8851			mean	SEM	n	mean	SEM	n	mean	SEM	n	mean	SEM	n		mean	SEM	n	mean	SEM	n	mean	SEM	n	mean	SEM	n
	1.23	0.53	2.29	3.8			0.86	1.3	1.78	0.97			1.02966	0.992343	2.33055	2.4208			0.18016	0.015	3	1.57504	0.20186	3	0.5164	0.23308	3	2.183	0.22741	3		0.14552	0.005	3	1.45599	0.2553	3	0.42489	0.1428	3	1.6045	0.3714	3
	0.97	1.41	3.4	2.83			1.56	1.07	0.92	2.12			1.05298	1.18055	1.97699	2.26501
	1.23	2.27	2.29	1.48			0.82	0.73	1.15	1.16			0.835853	1.52315	1.16632	1.72371
	1.76	1.3	1.6	1.96			0.92	0.97	1.78	0.9			0.785331	0.703386	1.68829	1.2209
