# Supplementary material for: eNOS-induced vascular barrier disruption in retinopathy by c-Src activation and tyrosine phosphorylation of VE-cadherin
Source: eLife. 2021 Apr 28;10:e64944. doi: 10.7554/eLife.64944 (PMC8087444; doi:10.7554/eLife.64944)
Supplement: Figure 2—source data 1. [file elife-64944-fig2-data1.xlsx]

## Sheet: Figure 2
Raw data for Figure 2, panels B, D and E
	Fig 2 B				Fig 2 D							Fig 2 E
	WT	S1176A			CON		VEGFA					CON		VEGFA
	0.594798	0.604612			WT	S1176A	WT	S1176A				WT	S1176A	WT	S1176A
	0.61844	0.562324			92	31	653	120				0.019807	0.016828	0.169898	0.025547
	0.573608	0.575699			95	66	587	73				0.015033	0.027144	0.127918	0.023564
	0.623073	0.55249			72	145	319	212				0.017157	0.038133	0.09489	0.060445
	0.616938	0.556349			142	72	384	86				0.01528	0.028535	0.15799	0.029264
					88	78	487	122				0.01529	0.02078	0.15698	0.03407
					40	110	861	165				0.009013	0.02076	0.20294	0.02195
					110	38	209	81				0.01739	0.009041	0.10306	0.04091
					45	139	232	208				0.009603	0.04365	0.09483	0.012883
					86	103	674	115				0.02032	0.02408	0.14035	0.01542
					89	90	543	155				0.02104	0.019509	0.35203	0.03842
					60	81	407	105				0.01697	0.02201	0.10721	0.043013
					140	54	485	53				0.008724	0.0064315	0.218982	0.067841
																																						0.907317	1.2	1.05366	0.995122
																																						0.995122	1.17073	1.05366	1.1122
																																						1.08293	1.46341	1.14146	1.22927
																																						1.02439	1.28781	1.22927	1.14146
																																						1.14146	1.37561	1.1122	1.17073
																																						0.907317	1.28781	1.1122	1.02439
																																						0.936585	1.43415	1.22927	1.17073
																																						0.995122	1.40488	1.1122	1.49268

## Sheet: Figure 2 Supplement 1
Raw data for Figure 2 - figure supplement 1, panels B and E
	Fig 2- SFig 1B											Fig 2 -SFig 1E																										S2 -Fig 1F
		1m			5m			10m					Ctrl												VEGF													PBS		L-NMMA
	Ctr	0.125393	0.187376	0.219933	0.105829	0.130897	0.094951	0.147837	0.1436	0.16069		1m	0.96	0.992	1.024	1.024	1	0.977	1.023	1	0.915	0.983	0.983	1.119	1.056	1.152	1.12	1.184	1.233	1.16	1.302	1.14	1.186	1.22	1.153	1.22		Ctrl	VEGF	Ctrl	VEGF
	HIS	0.219599	0.377695	0.451254	0.177522	0.236566	0.193138	0.156504	0.229633	0.258076		5m	0.893	1	1.036	1.071	0.848	1.13	1.065	0.956	0.982	1.055	0.982	0.982	1	1.179	1.214	1.321	1.217	1.217	1.239	1.109	1.345	1.382	1.345	1.309		0.965854	1.08293	0.819512	0.878049
	VEGF	0.272234	0.566617	0.380943	0.201109	0.346622	0.346965	0.251949	0.207799	0.43954		10m	0.915	0.949	1.017	1.118	0.857	1.071	1.024	1.048	0.986	0.869	1.101	1.043	0.949	1.118	1.118	1.22	1.214	1.476	1.238	1.357	1.014	1.072	1.014	1.072		1.05366	1.2	1.05366	0.878049
																																						1.14146	1.25854	1.05366	1.05366

## Sheet: Figure 2 Supplement 2
Raw data for Figure 2 - supplement figure 2, panels B-D
	Fig 2 - SFig 2B								Fig 2 - SFig 2C								Fig 2 - SFig 2D								S2 -Fig 2E
		Vehicle			L-NMMA					Vehicle			L-NMMA					Vehicle			L-NMMA					Vehicle			L-NMMA
	0 min	0.302	0.299	0.302	0.571	0.503	0.352		0 min	0.095	0.083	0.121	0.391	0.203	0.103		0 min	0.449	0.291	0.39	0.307	0.295	0.295		0 min	0.331	0.291	0.402	0.203	0.483	0.353
	1 min	0.926	0.716	0.703	0.829	0.86	0.904		1 min	0.275	0.112	0.118	0.099	0.105	0.138		1 min	0.836	0.901	0.873	0.255	0.109	0.301		1 min	0.584	0.904	0.819	0.639	0.837	0.65
	5 min	0.63	0.743	0.995	0.958	0.713	0.896		5 min	0.185	0.209	0.273	0.098	0.194	0.015		5 min	0.625	0.593	0.692	0.403	0.259	0.359		5 min	0.389	0.402	0.352	0.079	0.409	0.464
	10 min	0.468	0.786	0.502	0.854	0.89	0.311		10 min	0.331	0.304	0.284	0.301	0.165	0.268		10 min	0.402	0.108	0.301	0.592	0.621	0.662		10 min	0.806	0.862	0.765	0.122	0.402	0.203
	30 min	0.353	0.652	0.556	0.636	0.488	0.345		30 min	0.601	0.596	0.619	0.765	0.398	0.594		30 min	0.388	0.307	0.213	0.447	0.409	0.304		30 min	0.126	0.214	0.293	0.079	0.028	0.221

## Sheet: Figure 2 Supplement 3
Raw data for Figure 2- supplement figure 3, panel C
	Fig 2 - SFig 3C
	WT	S1176A
	0.525794	0.589125
	0.639729	0.531189
	0.678092	0.683157
		0.669706
