# Supplementary material for: eNOS-induced vascular barrier disruption in retinopathy by c-Src activation and tyrosine phosphorylation of VE-cadherin
Source: eLife. 2021 Apr 28;10:e64944. doi: 10.7554/eLife.64944 (PMC8087444; doi:10.7554/eLife.64944)
Supplement: Figure 3—source data 1. [file elife-64944-fig3-data1.xlsx]

## Sheet: Figure 3
Raw data for Figure 3, panel B
		Fig 3 B
		WT	S1176A				WT	S1176A	(Average/mouse)
		0.00379342	0.000802712				0.00217856	0.00067834
		0.00318765	0.000372987				0.002917	0.000856
		0.000536657	0.000431631				0.002752	0.000858
		0.00177004	0.00110603				0.00488	0.001696
		0.00247607
		0.0026974	0.001014
		0.000788716	0.000679
			0.000369
		0.001987	0.001272
		0.0084	0.000833
		0.004205	0.000408
		0.002266	0.000755
		0.000413	0.003339
		0.000233	0.000543
			0.000194
		0.003583	0.000642
		0.001295	0.00108
		0.001012
		0.001926	0.001031
		0.001923	0.00132
		0.006942	0.000613
		0.001458	0.000563
		0.004076	0.000765
		0.002554
		0.001096	0.001221
		0.009893	0.002791
		0.000434	0.002109
		0.002538	0.00153
		0.011579	0.00081
		0.00374	0.001713
