# Supplementary material for: eNOS-induced vascular barrier disruption in retinopathy by c-Src activation and tyrosine phosphorylation of VE-cadherin
Source: eLife. 2021 Apr 28;10:e64944. doi: 10.7554/eLife.64944 (PMC8087444; doi:10.7554/eLife.64944)
Supplement: Figure 4—source data 1. [file elife-64944-fig4-data1.xlsx]

## Sheet: Figure 4
Raw data for Figure 4, panels B-E, G-H
	Fig 4 B			Fig 4C			Fig 4 D							Fig 4E			Fig 4 G					Fig 4 H
	PBS	L-NMMA		PBS	L-NMMA		PBS			L-NMMA				PBS	L-NMMA		WT		Y685F			WT		Y685F
	8.1122	3.9419		9.828	7.8733		mean	SD	n	mean	SD	n		109	143		PBS	L-NMMA	PBS	L-NMMA		PBS	L-NMMA	PBS	L-NMMA
	6.2212	3.0607		10.4556	12.3159		8902.37	16300.8	109	4109.38	11731.6	143		125	112		12.3057	6.5871	7.2785	7.6464		17.6931	16.1833	16.0003	18.8812
	10.5216	4.4451		16.1447	11.8489		8739.64	18364	125	6270.74	16730	112		65	105		11.6552	7.2503	7.2959	7.3574		16.6561	13.8361	17.0131	15.6838
							16182.3	29691.1	65	5186	13832.8	105		83	69		11.0355	6.3874	7.4027	6.5015		18.6843	16.7811	14.5074	18.421
	9.2431	5.332		18.05	15.06		8566.92	13816.4	83	9651.68	15802	69		46	42		13.3524	7.2101	7.6591	7.5306		16.7214	18.8813	13.0289	16.2659
	10.0548	7.366		19.95	21.96		17301.2	43494	46	13344.3	19691	42		34	48
	8.5169	4.92		16.55	22.1		15346.3	20676.7	34	7980.15	8754.97	48		30	89
							13896.8	28926.2	30	6905	13211	89		73	192
	10.497	7.957		15.27	18.84		12557.7	44220	73	4733.28	10304	192		97	75
	9.785	8.874		14.19	20.55		11533.6	30439.6	97	11027.8	24680.3	75		67	176
		9.685			19.45		11799.5	22674.5	67	4213	6960.71	176		113	116
							11533.6	28696	113	9887.31	23103	116		75	154
							11799.5	25421.3	75	7994.25	20062.7	154			124
										6173	15318.7	124

## Sheet: Figure 4 Supplement 1
Raw data for Figure 4 - figure supplement 1, panels B, D and F
	Fig 4-SFig 1B				Fig 4- SFig 1D				Fig 4 - SFig 1F
	WT	S1176A			WT	S1176A			WT	S1176A
	0.697169	0.689594			17172	42914			0.206417	0.34884
	0.636135	0.810863			32359	18275			0.280394	0.623342
	0.627428	0.619863			21220	12810			0.537342	0.319863
	0.475398	0.670822			23563	25664			0.448012	0.201512
