# Supplementary material for: eNOS-induced vascular barrier disruption in retinopathy by c-Src activation and tyrosine phosphorylation of VE-cadherin
Source: eLife. 2021 Apr 28;10:e64944. doi: 10.7554/eLife.64944 (PMC8087444; doi:10.7554/eLife.64944)
Supplement: Figure 5—source data 1. [file elife-64944-fig5-data1.xlsx]

## Sheet: Figure 5
Raw data for Figure 5, panels B-E
	Fig 5 B							Fig 5 C			Fig 5 D			Fig 5E
	PBS	L-NMMA		PBS	L-NMMA			PBS	L-NMMA		PBS	L-NMMA		PBS	L-NMMA
	0.00393814	0.00131985		0.00400888	0.0010046			0.26163	0.1643		34818.1	20002		10.187	9.392
	0.00402378	0.00224055		0.0049983	0.0039805			0.562905	0.155049		26610.2	44319.5		13.606	10.476
	0.00417514	0.00131042		0.0031696	0.0021305			0.257667	0.130541		45756.7	65112.3		14.734	12.735
	0.0038956	0.000397685		0.0063694	0.0030643			0.225538	0.176342		54709.2	42083.9		9.495	11.588
	0.00498982	0.0032851		0.004636	0.0030138			0.258951	0.186121		40273.9	28722.6		10.28	12.773
	0.00500591	0.00449395
	0.00476885	0.00354555
	0.00506043	0.00438748
	0.00334848	0.00195899
	0.00332957	0.000402741
	0.00143855	0.00252118
	0.0034039	0.00253694
	0.00512666	0.0018442
	0.00478642	0.00256023
	0.00840852	0.00227447
	0.0055567	0.0047221
	0.00480778	0.0035204
	0.00431154	0.00362241
	0.00373261	0.00123532
	0.0055278	0.00308261

## Sheet: Figure 5 Supplement 1
Raw data for Figure 5 - figure supplement 1, panels B, D and F
	Fig 5- SFig 1B				Fig 5- SFig 1D				Fig 5 - SFig 1F
	WT	S1176A			WT	S1176A			WT	S1176A
	0.678901	0.522687			15172	36694			0.281526	0.282765
	0.435811	0.602784			30423	21112			0.607342	0.296981
	0.494554	0.613493			21159	15769			0.441452	0.315747
	0.586809	0.578982			22758	24904			0.400588	0.743968
