# Supplementary material for: eNOS-induced vascular barrier disruption in retinopathy by c-Src activation and tyrosine phosphorylation of VE-cadherin
Source: eLife. 2021 Apr 28;10:e64944. doi: 10.7554/eLife.64944 (PMC8087444; doi:10.7554/eLife.64944)
Supplement: Supplementary file 1. [file elife-64944-supp1.xlsx]

## Sheet: Supplementary file 1A
	Supplementary file 1A. Body weights from OIR experiments in Figure 1 (suppl file 1Aa), Figure 4 Figure PBS/L-NMMA (suppl file 1Ab), Figure 4 VEC-WT, VEC-Y685F (suppl file 1Ac)
	Suppl file 1Aa			Nos+/+			Nos3S1176A/S1176A
				Body weight (g)			Body weight (g)
	Litter 1			6.3			5
				6.5
	Litter 2			4.6			4.9
				5
	Litter 3			8.2			8
	Litter 4			5.3			5.3
	Litter 5			8.9			8.6
		Body weight		6.400 +/-	Body weight		6.360 +/-
		(mean +/- SEM)		0.6157	(mean +/- SEM)		0.8004
	Suppl file 1Ab			PBS			L-NMMA
				Body weight (g)			Body weight (g)
	Litter 1			6.97			7.65
				6.89			7.62
				6.89			7.57
	Litter 2			6.84			6.97
				6.85			6.91
				7.47			7.03
	Litter 3			7.29			7.1
				6.97			6.73
							6.21
		Body weight		7.021 +/-	Body weight		7.088 +/-
		(mean +/- SEM)		0.08188	(mean +/- SEM)		0.1572
	Suppl file 1Ac			VEC-WT			VEC-Y685F
				Body weight (g)			Body weight (g)
	Litter 1			6.2			6.44
				6.87			6.04
				5.88
	Litter 2			6.03			6.41
				5.27			6.42
				5.96			5.06
	Litter 3			6.5			5.71
				6.27			5.84
							6.23
		Body weight		6.123 +/- 0.1663	Body weight		6.019 +/-
		(mean +/- SEM)			(mean +/- SEM)		0.1681

## Sheet: Supplementary file 1B
Supplementary file 1B. Body weights from microsphere injection experiments Figure 3 (suppl file 1Ba) and Figure 5 (suppl file 1Bb)
Suppl file 1Ba		Nos+/+		Nos3S1176A/S1176A
		Body weight (g)		Body weight (g)
		5.39		5.47
		6.29		6.06
		5.89		5.85
		6.35		6.17
	Body weight (mean +/- SEM)	5.980 +/- 0.2216	Body weight (mean +/- SEM)	5.888 +/- 0.1542
Suppl file 1Bb		PBS		L-NMMA
		Body weight (g)		Body weight (g)
		5.98		7.02
		6.2		7.15
		6.54		5.86
		6.13		5.75
		6.82		6.35
	Body weight (mean +/- SEM)	6.334 +/- 0.1522	Body weight (mean +/- SEM)	6.426 +/- 0.2881

## Sheet: Supplementary file 1C
Supplementary File 1C. Body weights from pericyte coverage, macrophage influx and vascular perfusion experiments, Figure 1 - figure supplement 3 (Suppl file 1Ca), Figure 4 - figure supplement 1 (Suppl file 1Cb), Figure 5 - figure supplement 1 (Suppl file 1Cc)
Suppl file 1Ca		Nos+/+		Nos3S1176A/S1176A
		Body weight (g)		Body weight (g)
		5.96		5.47
		5.91		6.06
		6.22		5.85
		6.05		6.17
	Body weight (mean +/- SEM)	6.035 +/- 0.0681	Body weight (mean +/- SEM)	6.000 +/- 0.1127
Suppl file 1Cb		PBS		L-NMMA
		Body weight (g)		Body weight (g)
		6.15		6.21
		6.51		5.65
		5.48		6.22
		5.96		6.17
	Body weight (mean +/- SEM)	6.025 +/- 0.2145	Body weight (mean +/- SEM)	6.063 +/- 0.1379
Suppl file 1Cc		PBS		L-NMMA
		Body weight (g)		Body weight (g)
		6.39		6.58
		6.02		5.54
		5.4		5.93
		6.26		6.55
	Body weight (mean +/- SEM)	6.018 +/- 0.2196	Body weight (mean +/- SEM)	6.150 +/- 0.2526
